# Supplementary material
Source: MDPI journal article supplement (https://www.mdpi.com/2071-1050/16/2/594)
Supplement: s1 [file s1]

**Table S1.** Chemical Groups, Physicochemical Properties and Mode of Action of all Detected Fungicides.

| Chemical Group | Active substance/<br>(Chemical Subgroup) <sup>1</sup> | CAS N <sup>o</sup> | Molecular<br>mass <sup>2</sup> | Mode of action <sup>2</sup>                                  |
|----------------|-------------------------------------------------------|--------------------|--------------------------------|--------------------------------------------------------------|
| Amide          | Benalaxyl<br>(acylalanine)                            | 71626-11-4         | 325.40                         | Ribosomal RNA synthesis<br>inhibitor                         |
|                | Metalaxyl<br>(acylalanine)                            | 57837-19-1         | 279.33                         | Ribosomal RNA synthesis<br>inhibitor                         |
|                | Pyracarbolid<br>(anilide)                             | 24691-76-7         | 217.27                         | NA                                                           |
|                | Methfuroxam<br>(anilide - furancarboxamide)           | 28730-17-8         | 229.27                         | Glucose and acetate<br>oxidative metabolism<br>inhibitor     |
|                | Mepronil<br>(anilide – phenylbenzamide)               | 55814-41-0         | 269.33                         | Mitochondrial succinate<br>dehydrogenase inhibitor<br>(SGHI) |
|                | Dimethomorph<br>(cinnamamide)                         | 110488-70-5        | 387.86                         | Cell wall biosynthesis<br>inhibitor                          |
|                | Furmecyclox<br>(furamide)                             | 60568-05-0         | 251.32                         | Mitochondrial function<br>inhibitor                          |
|                | Oxycarboxin **<br>(oxathiincarboxamide)               | 5259-88-1          | 267.31                         | Mitochondrial succinate<br>dehydrogenase inhibitor<br>(SDHI) |
| Antibiotic     | Cyflufenamid **<br>(phenylacetamide)                  | 180409-60-3        | 412.36                         | NA                                                           |
|                | Cycloheximide **                                      | 66-81-9            | 281.16                         | Protein biosynthesis<br>inhibitor                            |

Table S1. *Cont.*

| Chemical Group   | Active substance/<br>(Chemical Subgroup) <sup>1</sup> | CAS N°      | Molecular mass <sup>2</sup> | Mode of action <sup>2</sup>                                           |
|------------------|-------------------------------------------------------|-------------|-----------------------------|-----------------------------------------------------------------------|
| Azole            | Imazalil *<br>(Imidazole)                             | 35554-44-0  | 297.18                      | Sterol biosynthesis inhibitor <sup>3</sup>                            |
|                  | Flusilazole **<br>(triazole)                          | 85509-19-9  | 315.39                      | Sterol biosynthesis inhibitor                                         |
|                  | Propiconazole<br>(triazole)                           | 60207-90-1  | 342.22                      | Sterol biosynthesis inhibitor                                         |
|                  | Tebuconazole **<br>(triazole)                         | 107534-96-3 | 307.82                      | Sterol biosynthesis inhibitor                                         |
|                  | Tetraconazole *<br>(triazole)                         | 112281-77-3 | 372.15                      | Sterol biosynthesis inhibitor                                         |
|                  | Tricyclazole *                                        | 41814-78-2  | 189.24                      | Melanin biosynthesis<br>inhibitor in cell wall                        |
| Benzimidazole    | Benomyl *                                             | 17804-35-2  | 290.32                      | Inhibition of mitosis and cell<br>division (Beta-tubulin<br>assembly) |
|                  | Carbendazim **                                        | 10605-21-7  | 191.21                      | Inhibition of mitosis and cell<br>division (Beta-tubulin<br>assembly) |
|                  | Rabenzazole                                           | 40341-04-6  | 212.25                      | Inhibition of mitosis and cell<br>division (Beta-tubulin<br>assembly) |
|                  | Thiabendazole *                                       | 148-79-8    | 201.25                      | Inhibition of mitosis and cell<br>division (Beta-tubulin<br>assembly) |
| Benzoisothiazole | Probenazole                                           | 27605-76-1  | 223.25                      | Host plant defence induction                                          |

Table S1. *Cont.*

| Chemical Group     | Active substance/<br>(Chemical Subgroup) <sup>1</sup> | CAS N <sup>o</sup> | Molecular mass <sup>2</sup> | Mode of action <sup>2</sup>                                           |
|--------------------|-------------------------------------------------------|--------------------|-----------------------------|-----------------------------------------------------------------------|
| Carbamate          | Propamocarb                                           | 24579-73-5         | 188.3                       | Lipid synthesis inhibitor                                             |
|                    | Diethofencarb<br>(phenylcarbamate)                    | 87130-20-9         | 267.32                      | Inhibition of mitosis and cell<br>division (Beta-tubulin<br>assembly) |
| Dithiolane         | Isoprothiolane                                        | 50512-35-1         | 290.40                      | Phospholipid biosynthesis<br>inhibitor                                |
| Imidazolinone      | Fenamidone                                            | 161326-34-7        | 311.40                      | Quinone outside inhibitor<br>(QoI) <sup>4</sup>                       |
| Morpholine         | Dodemorph                                             | 1593-77-7          | 281.48                      | Sterol biosynthesis inhibitor                                         |
|                    | Fenpropimorph *                                       | 67564-91-4         | 303.48                      | Sterol biosynthesis inhibitor                                         |
| Organophosphorus   | Iprobenfos **                                         | 26087-47-8         | 288.34                      | Phospholipid biosynthesis<br>inhibitor                                |
| Oxazolidinedione   | Famoxadone                                            | 131807-57-3        | 374.39                      | Quinone outside inhibitor<br>(QoI) <sup>4</sup>                       |
| Oxazolidinone      | Oxadixyl                                              | 77732-09-3         | 278.30                      | Ribosomal RNA synthesis<br>inhibition                                 |
| Phenylpyrrole      | Fludioxonil *                                         | 131341-86-1        | 248.19                      | Effect on signal transduction                                         |
| Pyrimidine         | Ferimzone<br>(pyrimidinonehydrazone)                  | 89269-64-7         | 254.33                      | Uncoupler of oxidative<br>phosphorylation <sup>4</sup>                |
| Pyrroloquinolinone | Pyroquilon *                                          | 57369-32-1         | 173.21                      | Melanin biosynthesis<br>inhibitor in cell wall                        |
| Quinoline          | Ethoxyquin                                            | 91-53-2            | 271.34                      | Antioxidant (food<br>preservative) <sup>5</sup>                       |

Table S1. *Cont.*

| Chemical Group  | Active substance/<br>(Chemical Subgroup) <sup>1</sup> | CAS N <sup>o</sup> | Molecular mass <sup>2</sup> | Mode of action <sup>2</sup>                     |
|-----------------|-------------------------------------------------------|--------------------|-----------------------------|-------------------------------------------------|
| Spiroketalamine | Spiroxamine                                           | 118134-30-8        | 217.34                      | Sterol biosynthesis inhibitor                   |
|                 | Azoxystrobin **<br>(methoxyacrylate)                  | 131860-33-8        | 403.40                      | Quinone outside inhibitor<br>(QoI) <sup>4</sup> |
| Strobilurin     | Picoxystrobin **<br>(methoxyacrylate)                 | 117428-22-5        | 367.32                      | Quinone outside inhibitor<br>(QoI) <sup>4</sup> |
|                 | Kresoxim-Methyl **<br>(oximinoacetate)                | 143390-89-0        | 313.35                      | Quinone outside inhibitor<br>(QoI) <sup>4</sup> |
|                 | Trifloxystrobin **<br>(oximinoacetate)                | 141517-21-7        | 408.37                      | Quinone outside inhibitor<br>(QoI) <sup>4</sup> |

<sup>1</sup>Data retrieved from BCPC- British Crop Production Council's [91]. <sup>2</sup>Data retrieved from PPDB: Pesticide Properties Database [22]. <sup>3</sup>Data retrieved from [22]. <sup>4</sup>Data retrieved from [92]. <sup>5</sup>Data retrieved from [54]. \*Fungicide detected once in surface water; \*\*Fungicide detected once in groundwater. NA= Not available.

**Table S2.** Surface Water: Characterisation of the Sampling Stations

| Regions              | River Basin District (HR) | Water bodies                            | Sampling Station number | Station code /geographic coordinates                       | Localisation                                                                                   | UWWTP <sup>1</sup> equivalent inhabitants    | Potential Pressures                   |
|----------------------|---------------------------|-----------------------------------------|-------------------------|------------------------------------------------------------|------------------------------------------------------------------------------------------------|----------------------------------------------|---------------------------------------|
| North                | HR2                       | Ave river                               | 1                       | PT05G/06<br>Lat. (°N): 41,49565<br>Long (°W): -8,3212      | Taipas, Downstream of Prazins                                                                  | -----                                        | Agriculture / Animal production       |
|                      |                           |                                         | 2                       | PT05G/53<br>Lat. (°N): 41,40951<br>Long (°W): -8,38342     | Guimarães, Downstream of UWWTP Serzedelo I and II.                                             | Serzedelo I:126.000<br>Serzedelo II: 270 822 | Urban Agriculture / Animal production |
|                      | HR3                       | Tâmega river (international body water) | 3                       | Chaves<br>Lat. (°N): 41,713199<br>Long (°W): -7,507799     | Chaves, Downstream of UWWTP, A tributary (sub-basin) of the Douro river                        | Chaves: 57 748                               | Urban Agriculture / Animal production |
|                      |                           | Tinto river                             | 4                       | PT07F/05<br>Lat. (°N): 41,1539428<br>Long (°W): -8,5702716 | Porto, Freixo, Rio Tinto Campanhã, Downstream of UWWTP. A tributary (sub-basin) of Douro river | Freixo: 170 000                              | Urban                                 |
| Center               | HR4A                      | Vouga river                             | 5                       | PT09F/29<br>Lat. (°N): 40,672777<br>Long (°W): -8,560407   | Angeja, Downstream of Angeja                                                                   | -----                                        | Agriculture / Animal production       |
| West and Tejo Region | HR5A                      | S. Domingos (west - (reservoir))        | 6                       | PT18B/01<br>Lat. (°N): 39,33406<br>Long (°W): -9,31713     | S. Domingos                                                                                    | -----                                        | Agriculture / Animal production       |
|                      |                           | Tejo river (international body water)   | 7                       | PT16L/05<br>Lat. (°N): 39,660322<br>Long (°W): -7,569093   | Perais, near the border Portugal /Spain                                                        | -----                                        | Rural                                 |
|                      |                           |                                         | 8                       | PT16K/11<br>Lat. (°N): 39,5474596                          | Fratel reservoir                                                                               | -----                                        | Rural                                 |

|          |             |                                        |    |                                                               |                                                                           |                                                                     |                                                  |
|----------|-------------|----------------------------------------|----|---------------------------------------------------------------|---------------------------------------------------------------------------|---------------------------------------------------------------------|--------------------------------------------------|
|          |             |                                        |    | Long (°W):<br>-7,7934542                                      |                                                                           |                                                                     |                                                  |
|          |             |                                        | 9  | PT21B/22<br>Lat. (°N):<br>38,69522<br>Long (°W):<br>-9,234269 | Marina<br>Algés,<br>transitional<br>water<br>downstream<br>of<br>3 UWWTP: | Beirolas:<br>213 500<br>Chelas:<br>255 000<br>Alcântara:<br>756 000 | Urban,<br>Agriculture                            |
|          |             |                                        |    |                                                               |                                                                           |                                                                     |                                                  |
|          |             |                                        |    |                                                               |                                                                           |                                                                     |                                                  |
| Alentejo | HR6<br>/HR7 | Caia river                             | 10 | PT20O/04<br>Lat. (°N):<br>38,8831<br>Long (°W):<br>-7,0356    | Caia,<br>Posto Fiscal,<br>near the<br>border<br>Portugal<br>/Spain        | -----                                                               | Agriculture<br>/ Animal<br>production            |
| Algarve  | HR8         | Ria Formosa<br>(Coastal<br>water)      | 11 | PT31J/20<br>Lat. (°N):<br>37,01814<br>Long (°W):<br>-7,84396  | Olhão,<br>Downstream<br>of UWWTP                                          | Faro /<br>Olhão:<br>113 200                                         | Urban<br>Fish<br>stocking<br>Fishing<br>activity |
|          |             |                                        | 12 | PT31J/02<br>Lat. (°N):<br>37,00194<br>Long (°W):<br>-7,92199  | Faro,<br>Downstream<br>of UWWTP                                           | Faro /<br>Northwest<br>44 530                                       | Urban                                            |
|          |             | Arade river<br>(Transitional<br>water) | 13 | PT31F/01S<br>Lat. (°N):<br>37,14425<br>Long (°W):<br>-8,51528 | Portimão<br>UWWTP                                                         | Portimão:<br>140 000                                                | Urban                                            |

<sup>1</sup>Urban Waste Water Treatment Plants

**Table S3.** Groundwater: **Characterization** of the Sampling Stations

| Regions       | River basin district (RH) | Sampling station | Station code /geographic coordinates | Localisation Well (W) Piezometer (P)            | Potential Pressures                                       |
|---------------|---------------------------|------------------|--------------------------------------|-------------------------------------------------|-----------------------------------------------------------|
| North         | RH2                       | 1                | 68/12<br>41.490;<br>-8.744           | Esposende (W)                                   | Mainly<br>Animal production                               |
|               |                           | 2                | 68/11<br>41.5324;<br>-8.75967        | Esposende (W)                                   | Mainly<br>Animal production                               |
| Center        | RH4A                      | 3                | 163/125<br>40.767;<br>-8.599         | Murtosa (W)                                     | Urban<br>Mainly<br>Agriculture                            |
|               |                           | 4                | 240/26 40.18863;<br>-8.58919         | Formoselha (P)                                  | Urban<br>Mainly<br>Agriculture<br>(Region of rice-fields) |
|               |                           | 5                | -<br>39.808;<br>-8.751               | Martos Leiria (W)                               | Mainly<br>Agriculture                                     |
| West and Tejo | RH5A                      | 6                | 377/94<br>39.073;<br>-8.728          | Salvaterra de Magos (W)                         | Mainly<br>Agriculture<br>(Region of rice-fields)          |
|               |                           | 7                | 405/17<br>38.939;<br>-8.863          | Samora Correia (W)                              | Mainly<br>Agriculture<br>(Region of rice-fields)          |
|               |                           | 8                | -<br>38.567035;<br>-8.727683         | Marateca (W)                                    | Mainly<br>Agriculture<br>(Region of rice-fields)          |
| Alentejo      | RH6/RH7                   | 9                | 401/36<br>38.97793;<br>-7.00075      | Campo Maior (P)                                 | Mainly<br>Animal production<br>(Region of rice-fields)    |
|               |                           | 10               | -<br>38.377273;<br>-7.750984         | Monte Trigo (W)                                 | Agriculture<br>Animal production                          |
|               |                           | 11               | -<br>38.052;<br>-8.399               | Vale da Eira (Ermidas Sado) (W)                 | Agriculture<br>(Region of rice-fields)                    |
|               |                           | 12               | -<br>37.996;<br>-8.607               | São Bartolomeu da Serra (Santiago do Cacém) (W) | Agriculture                                               |

|         |     |    |                                 |                            |                               |
|---------|-----|----|---------------------------------|----------------------------|-------------------------------|
| Algarve | RH8 | 13 | 595/309<br>37.16934<br>-8.45791 | Querença-<br>Silves<br>(P) | Agriculture<br>(Orchard zone) |
|---------|-----|----|---------------------------------|----------------------------|-------------------------------|



**Table S4.** Detection of Frequency and Geographic Distribution of Fungicides in Surface Water (2017-2019)

| Fungicides     | 2017- 2019               |                                  |                            |                       |                       |             |                      |                      |                                  |            |                      |                     |                         | Frequency (d/n)x100%<br><br>d- Nr. of detections<br><br>n- Nr. of stations |
|----------------|--------------------------|----------------------------------|----------------------------|-----------------------|-----------------------|-------------|----------------------|----------------------|----------------------------------|------------|----------------------|---------------------|-------------------------|----------------------------------------------------------------------------|
|                | Sampling stations (n=13) |                                  |                            |                       |                       |             |                      |                      |                                  |            |                      |                     |                         |                                                                            |
|                | Ave river<br>Taipas      | Ave river<br>Serzedelo<br>I - II | Tâmega<br>river-<br>Chaves | Tinto river<br>Freixo | Vouga river<br>Angeja | S. Domingos | Tejo river<br>Perais | Tejo river<br>Fratel | Tejo river<br>Marina de<br>Algés | Caia river | Ria Formosa<br>Olhão | Ria Formosa<br>Faro | Arade river<br>Portimão |                                                                            |
|                | 1                        | 2                                | 3                          | 4                     | 5                     | 6           | 7                    | 8                    | 9                                | 10         | 11                   | 12                  | 13                      |                                                                            |
| Azocystrobin   |                          |                                  |                            |                       | X                     | X           |                      |                      | X                                | X          |                      |                     |                         | 31                                                                         |
| Benalaxil      | X                        |                                  |                            |                       |                       | X           |                      |                      |                                  |            | X                    |                     |                         | 23                                                                         |
| Carbendazim    |                          |                                  |                            | X                     |                       | X           |                      |                      |                                  |            |                      |                     |                         | 15                                                                         |
| Dimethomorph   |                          | X                                |                            |                       |                       | X           |                      |                      |                                  |            |                      |                     |                         | 15                                                                         |
| Dodemorph      |                          | X                                | X                          |                       |                       | X           |                      |                      | X                                |            | X                    |                     | X                       | 46                                                                         |
| Ethoxyquin     | X                        | X                                |                            |                       | X                     |             |                      |                      | X                                |            | X                    | X                   | X                       | 54                                                                         |
| Fenamidone     | X                        | X                                | X                          | X                     |                       |             |                      |                      | X                                | X          |                      |                     |                         | 46                                                                         |
| Ferimzone      | X                        |                                  |                            |                       | X                     | X           | X                    |                      | X                                |            | X                    | X                   |                         | 54                                                                         |
| Furmecyclox    |                          | X                                |                            | X                     |                       | X           |                      |                      | X                                |            |                      |                     | X                       | 38                                                                         |
| Iprobenfos     |                          |                                  | X                          |                       |                       |             |                      |                      | X                                |            | X                    |                     |                         | 23                                                                         |
| Isoprothiolane |                          |                                  |                            |                       |                       |             |                      |                      | X                                |            | X                    | X                   | X                       | 31                                                                         |

[illegible]

**Table S5.** Detection of Frequency and Geographic Distribution of Fungicides in Groundwater (2016-2019)

| Antifungals   | 2016 - 2019              |           |         |            |        |        |                        |                |          |             |             |                              |                           | Frequency<br>(d/n)x100 %<br><br>d-Nr. of<br>detections<br><br>n-Nr. of stations |                 |
|---------------|--------------------------|-----------|---------|------------|--------|--------|------------------------|----------------|----------|-------------|-------------|------------------------------|---------------------------|---------------------------------------------------------------------------------|-----------------|
|               | Sampling stations (n=13) |           |         |            |        |        |                        |                |          |             |             |                              |                           |                                                                                 |                 |
|               | Esposende                | Esposende | Murtosa | Formoselha | Martos | Leiria | Salvaterra de<br>Magos | Samora Correia | Marateca | Campo Maior | Monte Trigo | Vale da Eira<br>Ermidas Sado | S. Bartolomeu da<br>Serra |                                                                                 | Querença Silves |
|               | 1                        | 2         | 3       | 4          | 5      | 6      | 7                      | 8              | 9        | 10          | 11          | 12                           | 13                        |                                                                                 |                 |
| Benalaxyl     |                          |           |         |            | X      |        | X                      | X              |          |             |             |                              |                           | 23                                                                              |                 |
| Diethofencarb |                          |           |         |            |        | X      | X                      |                |          |             |             |                              |                           | 15                                                                              |                 |
| Dodemorph     | X                        |           |         |            | X      | X      |                        |                | X        |             | X           |                              | X                         | 46                                                                              |                 |
| Ethoxyquin    | X                        | X         | X       |            | X      | X      | X                      | X              |          | X           | X           | X                            |                           | 77                                                                              |                 |
| Famoxadone    |                          |           |         |            |        | X      |                        | X              |          |             |             |                              |                           | 15                                                                              |                 |
| Fenamidone    |                          |           |         |            |        | X      |                        |                |          | X           |             |                              |                           | 15                                                                              |                 |
| Ferimzone     |                          | X         |         |            | X      |        |                        | X              | X        | X           | X           | X                            |                           | 54                                                                              |                 |
| Furmecyclox   | X                        | X         | X       |            |        |        |                        |                | X        |             |             |                              | X                         | 38                                                                              |                 |
| Mepronil      |                          |           |         |            | X      |        |                        |                |          | X           | X           |                              |                           | 23                                                                              |                 |
| Metalaxyl     |                          |           | X       |            | X      | X      |                        | X              |          |             |             |                              | X                         | 31                                                                              |                 |
| Methfuroxam   |                          |           |         |            | X      |        |                        | X              |          | X           |             |                              |                           | 23                                                                              |                 |



## Document S6. Analytical Method Description

### Qualitative Analysis Method Used for the Characterisation of Fungicides in Surface-Groundwater

This methodology involved two steps corresponding to the extraction of the adsorbent of POCIS extraction disks and subsequent qualitative determination by Ultra Performance Liquid Chromatography-High Resolution Mass Spectrometry (UHPLC-QqTOF-MS).

#### Sample Extraction

After drying the POCIS disks, the membrane on one side of the support was cut.

The adsorbent was transferred to an empty cartridge extracted five times with 2 mL of methanol, making a total volume of 10 mL collected in a glass vial. This extract was concentrated under nitrogen current to a final volume of about 1 mL. To the extract was added the <sup>13</sup>C<sub>3</sub> internal caffeine standard. The extract in methanol is taken to dryness in rotavapor under vacuum at 35°C and reconstituted in a mixture of water/methanol (v:v 4:1) for subsequent injection into the UHPLC-QqTOF-MS system. For surface water samples, two discs for sampling collection were analysed. The adsorbents of the duplicated discs were extracted simultaneously. In the case of groundwater samples, only one POCIS sampler was used per collection point.

#### Ultra-Performance Liquid Chromatography-High Resolution Mass Spectrometry (UHPLC-QqTOF-MS) Analysis

Extracts were analysed on a UHPLC-QqTOF-MS system composed of an UltiMate® 3000 RSLCnano system (Thermo Scientific Inc., Waltham, MA, USA), interfaced with a QqTOF Impact II mass spectrometer with an ESI source (Bruker Daltonics, Bremen, Germany). Three aliquots were analysed in both ESI positive and negative mode for each water extract, and as a control, a “blank” sample of the mixture of water/methanol (4:1).

Chromatographic separation was achieved with a Kinetex C18 column (150 X 2.1 mm; 2.6 µm particle size; Phenomenex: pore size A<sup>o</sup> = 100; surface area = 200 m<sup>2</sup>/g; carbon load = 9%) using an elution gradient of 0.1% v/v formic acid in water (mobile phase A) and 0.1% v/v formic acid in acetonitrile (mobile phase B), at a flow rate of 200 mL/min. The elution conditions were as follows: 0–1.4 min, isocratic 7% B; 1.4–10.0 min, linear gradient to 50% B; 10–15 min, linear gradient to 100% B; 15–18 min isocratic 100% B; 18–19 min, linear gradient to 7% B; 19–25 min, isocratic to 7% B. The injection volume was 20 µL. The column and the autosampler were

maintained at 35°C, respectively. The mass spectrometer parameters were set as follows: endplate offset: 500 V; capillary voltage: 4.5 and 2.5 kV (positive and negative mode, respectively); nebuliser: 2.8 bars; dry gas: 8 L/min; dry temperature: 200°C. Internal calibration was performed for sodium formate clusters, with a sodium formate solution of 10 mM introduced to the ion source via a 20 L loop at the beginning of each analysis using a six-port valve. Calibration was then performed using high-precision calibration mode (HPC). The mass spectra were acquired in the broadband collision-induced dissociation (bbCID) mode in a range between 50–1000 m/z, with a scan speed of 1 Hz. MS/MS experiments were performed in a data-dependent-acquisition (DDA) mode with an acquisition rate of 3 Hz using a dynamic method with a fixed cycle time of 3s. Dynamic exclusion duration was 0.4 min. The 49 standards were analysed in the MRM acquisition mode, with collision energy defined according to the mass, load of each ion and an isolation window of 5 Da. Under the instrumental conditions used, the TOF (FWHM) resolution power is between 36,000–40,000 to m/z 226.1593, 430.9137 and 702.8636.

#### Data Analysis and Validation

Mass spectrometry data were processed using the Data Analysis 4.4 and Target Analysis 1.3 software (Bruker Daltonics). An in-house mass library was built for 49 standards plus 620 suspected substances (insecticides, fungicides, herbicides, drugs, metabolites).

For the 49 standards (Sigma-Aldrich) previously analysed by MRM, the database includes the expected retention time, accurately measured mass, molecular formula, and qualifier ions for each standard compound. The (possible) elemental composition of peaks of interest was calculated using the algorithm Smart Formula 3D within Bruker software for the remaining compounds. This library was used for accurate mass screening for (non)target compounds and unknowns using the Find-Compounds-Chromatogram via SigmaFiT™ tools of the Target Analysis software, which creates a “peak chromatogram base” for m/z values above a threshold intensity value. Values for retention time deviation lower than 0.3 min; mass deviation less than 5 ppm and mSigma less than 100 were considered acceptable for positive confirmation (mSigma <100, acceptable, <50 good, and <25 excellent). After screening in Target Analysis, the Data Analysis potentialities were used to check the data manually.

Analysing the samples with a QqTOF mass spectrometer, the fungicides in complex matrices were detected at concentrations as low as 50 ng/L.
